# Supplementary material for: Immunolipidomics Reveals a Globoside Network During the Resolution of Pro-Inflammatory Response in Human Macrophages
Source: PubMed Central journal article supplement (PMC9280915; doi:10.3389/fimmu.2022.926220), 2022-06-30
Supplement: DataSheet_1.pdf [file DataSheet_1.pdf]

**A**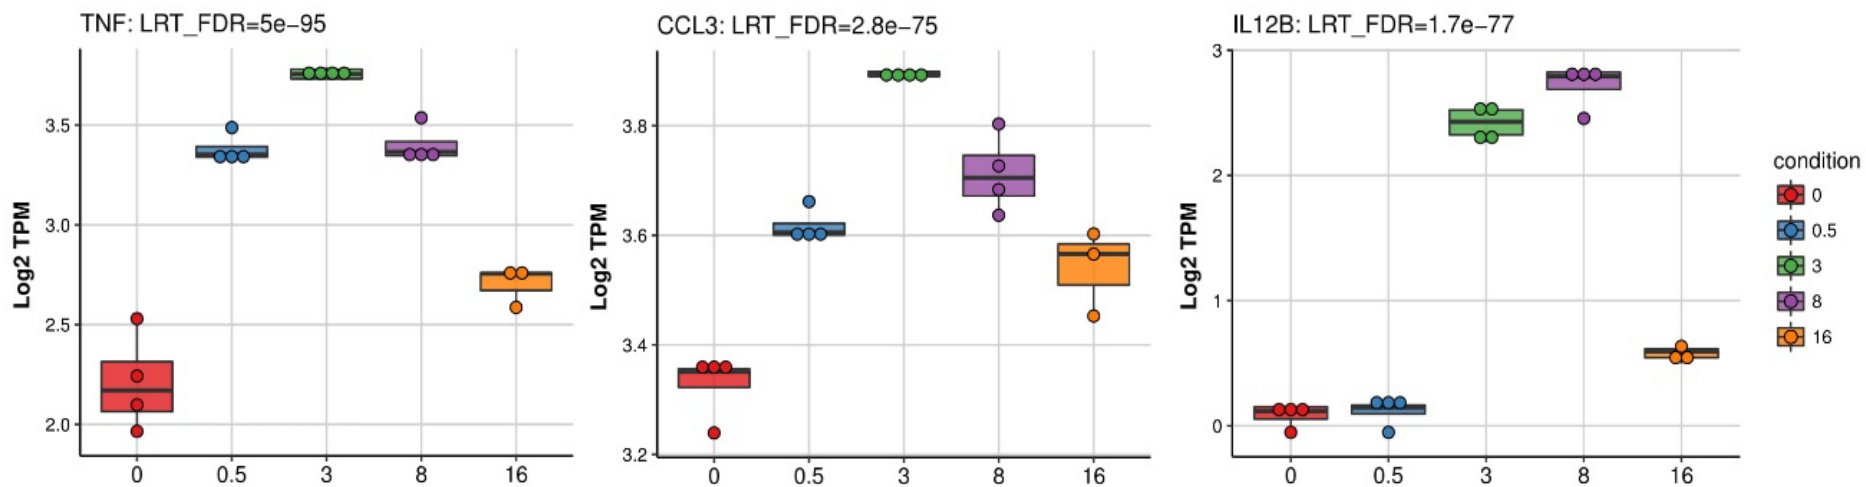**B**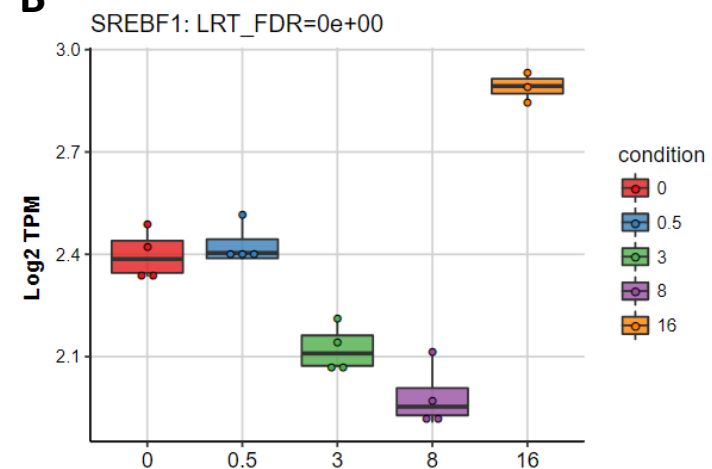

**Figure S1.** RNA-seq profile (Log<sub>2</sub> TPM) of **(A)** *TNF*, *IL12B* and *CCL3* shows a peak at 3h post-LPS stimulation in hMDMs. **(B)** *SREBF1* (encoding *SREBP1*) show a biphasic regulation with distinct pro-inflammatory (3h) and resolution (16h) mRNA expression profiles. At least n=3 biological replicates per time point; TPM, transcript per million; FDR, false discovery rate.

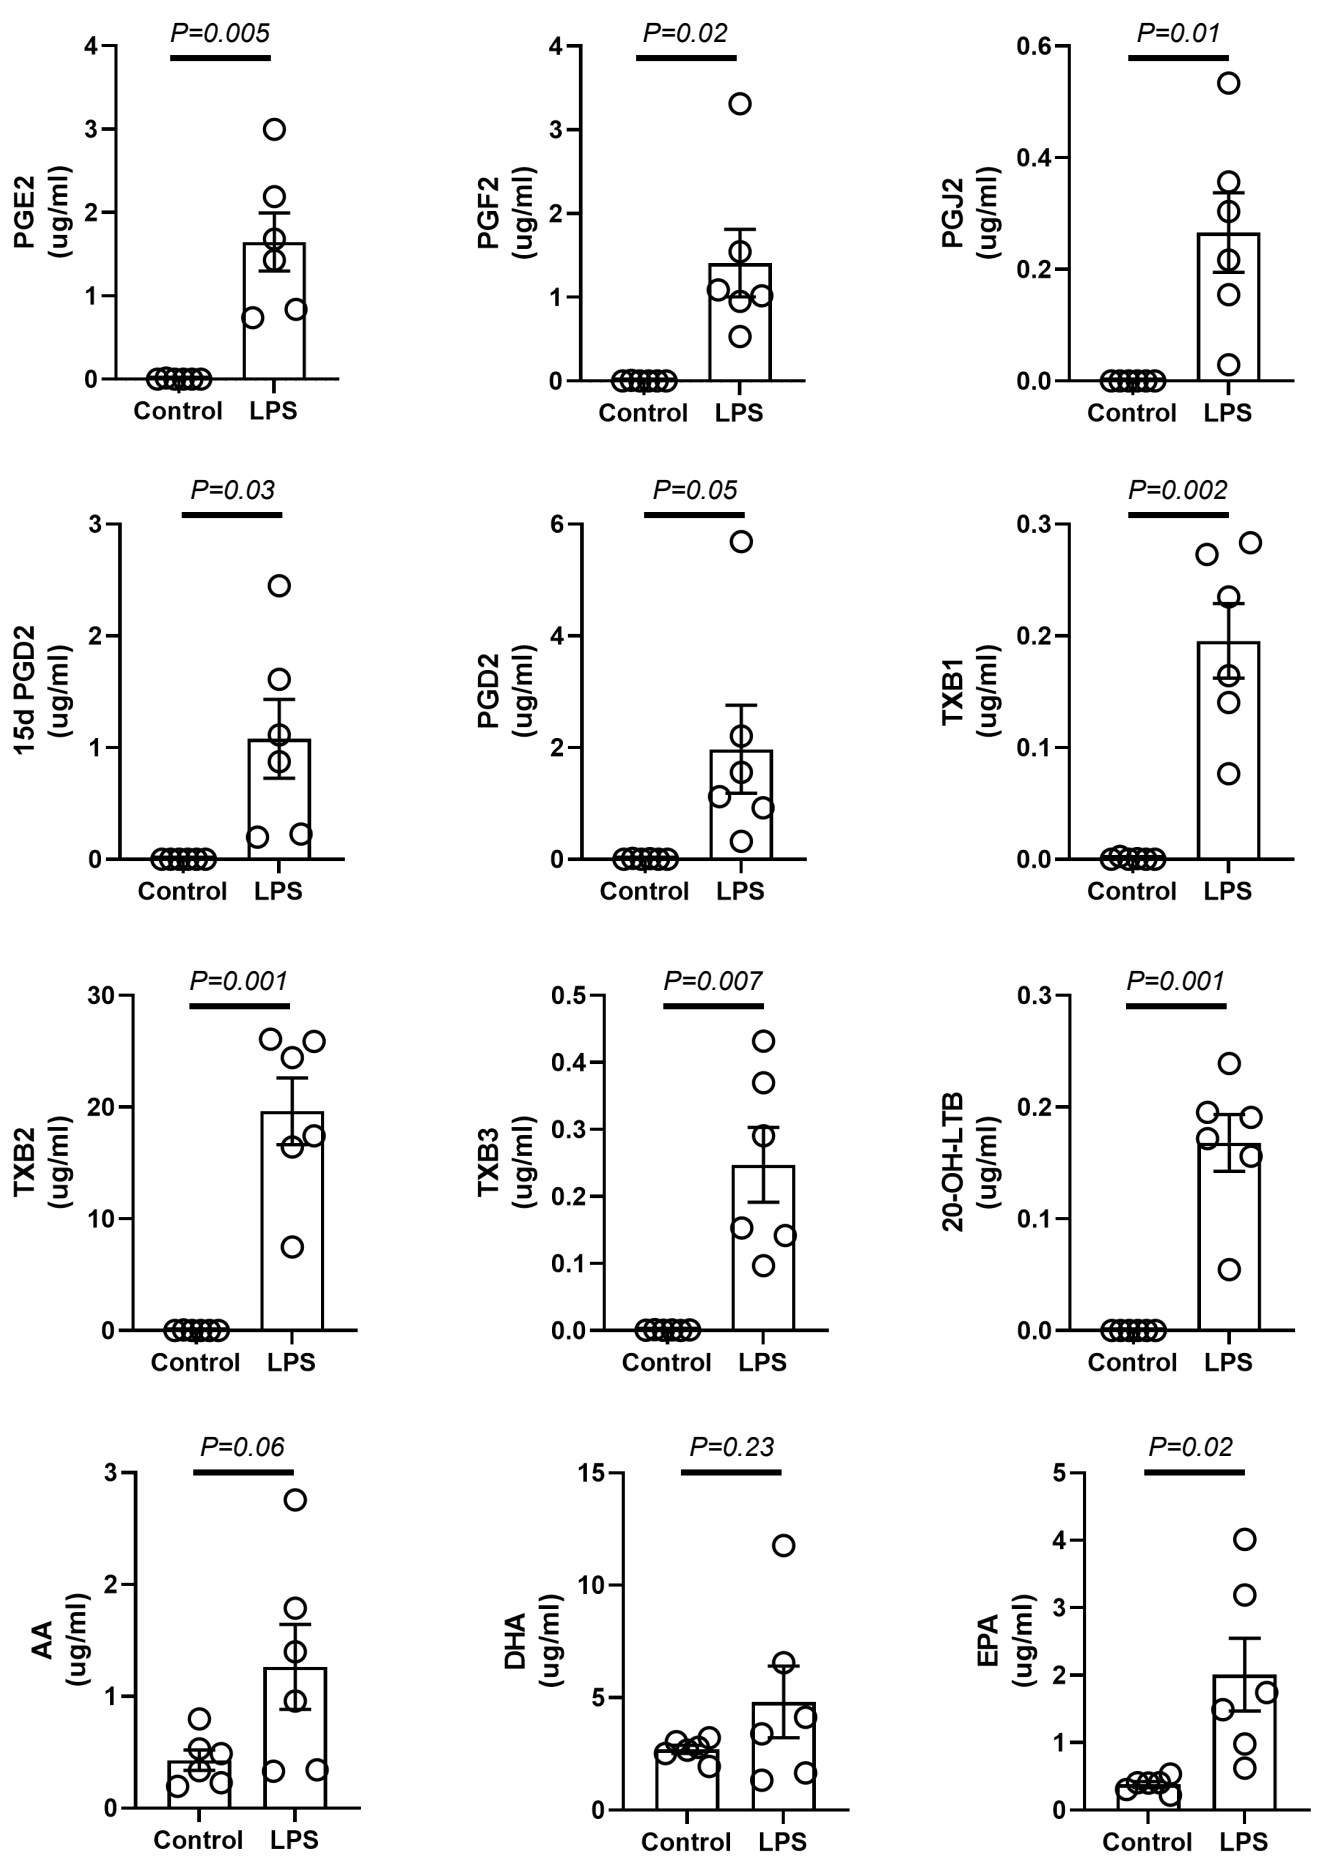

**Figure S2.** Eicosanoids and AA, DHA and EPA levels measured in the media of control (basal) and 16-stimulated hMDMs. N=6 donors per condition; significance tested by paired t-test.

## Spingolipid metabolism

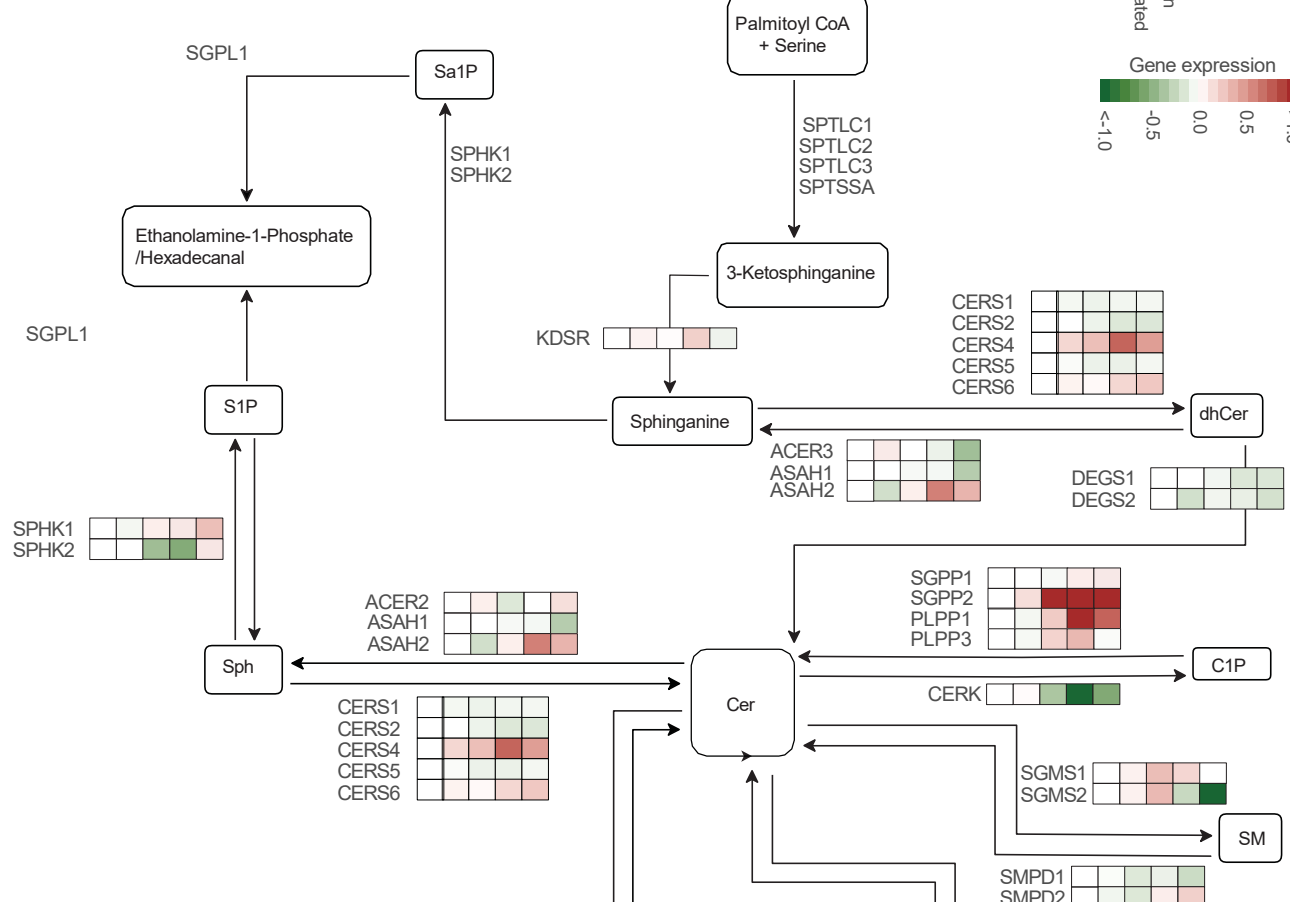

## Glycosphingolipid metabolism

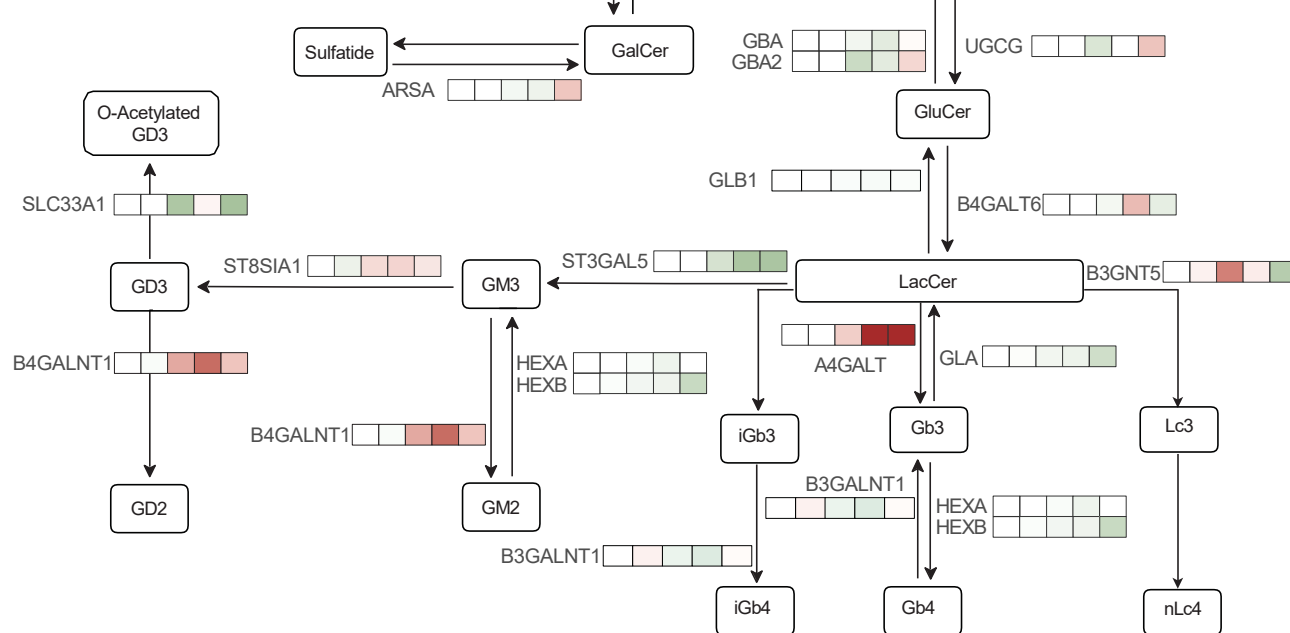

**Figure S3.** The LPS kinetics of expression of the enzymes in the sphingolipid and glycosphingolipid pathways in human macrophages. All known enzymes of the pathway and their five time-dependent relative expression (untreated, 30 min, 3h, 8h and 16h) are shown.
